# Supplementary material
Source: Springer Nature journal article supplement (https://www.springermedizin.de/resource/supplementary/12985_2010_1094_MOESM1_ESM.pdf/9609128)

Time post infection

2 hours

4 hours

6 hours

8 hours

MOI

0.1

0.5

2.5

10

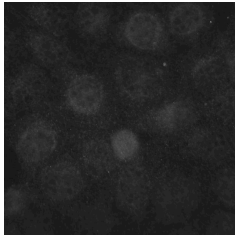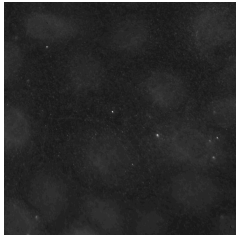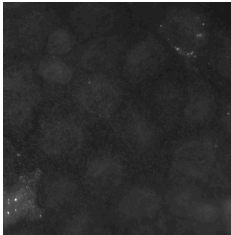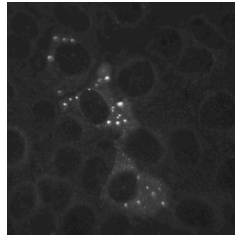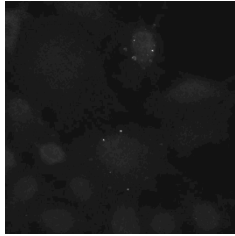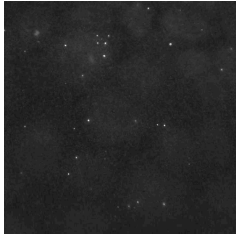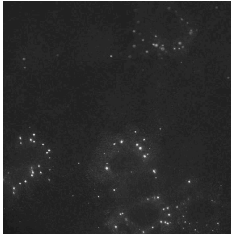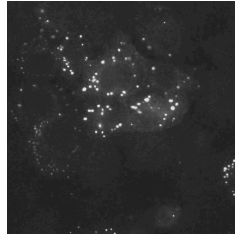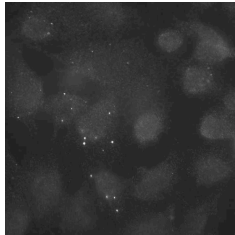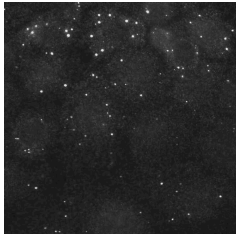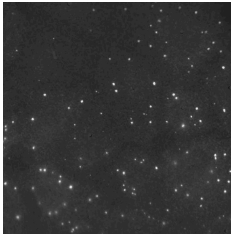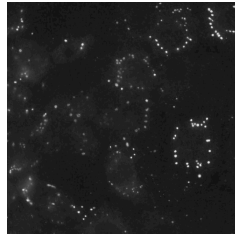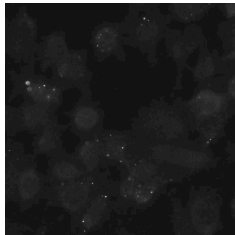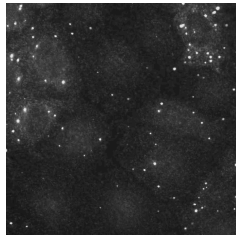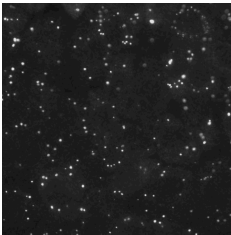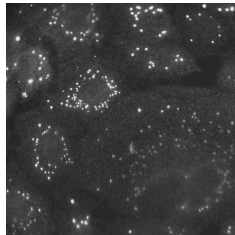

Mock infected cells

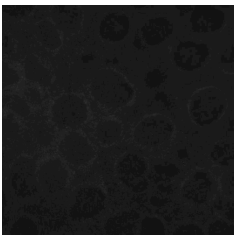

Supplement: MOESM1 [file 9609128]
